# Supplementary material
Source: publisher site journal article supplement (https://www.dovepress.com/article/593468)
Supplement: Supplementary file 1 [file Revised%20Supplementary.docx]

**Supplementary Table S1. Correlations Between ACLS and Cognitive Measures Across Studies**

| **Reference / Cognitive Domain, Measurement** | **Mayer 34** | **David & Riley 37** | **Shapiro 43** | **Kehrberg et al 25** | **Penny et al 31** | **Roitman & Katz 41** | **Velligan et al 29** | **Ziv et al 35** | **Secrest et al 40** | **Marom et al 26** | **Leung & Man 44** | **Su et al 23** | **Park et al 27** | **Rojo-Mota et al 32** | **Rojo-Mota et al 22** | **Wesson et al 38** | **Schubmehl et al 28** | **Park & Lee 36** | **Rojo-Mota et al 42** | **Huertas-Hoyas et al 30** | **Chiu et al 33** | **Ozturk et al 39** | **n/N Sig** |
| --- | --- | --- | --- | --- | --- | --- | --- | --- | --- | --- | --- | --- | --- | --- | --- | --- | --- | --- | --- | --- | --- | --- | --- |
| **Global Cognition** |  |  |  |  |  |  |  |  |  |  |  |  |  |  |  |  |  |  |  |  |  |  | **18/19** |
| MMSE |  |  |  | +S | +M |  | +S |  |  | +S | +S |  | +S |  | +M |  | +S |  |  | +M |  |  | 9/9 |
| MoCA |  |  |  |  |  |  |  |  |  |  |  |  |  | +M |  |  |  | +M |  |  | +S |  | 3/3 |
| IQ (Full Scale) | +M | +M | n.s. |  |  |  |  |  |  |  |  |  |  |  |  |  |  |  |  |  |  |  | 2/3 |
| Performance IQ | +S |  | +S |  |  |  |  |  |  |  |  |  |  |  |  |  |  |  |  |  |  |  | 2/2 |
| LOTCA-II Total Score |  |  |  |  |  |  |  |  |  |  |  | +S |  |  |  |  |  | +S |  |  |  |  | 2/2 |
| **Executive Function** |  |  |  |  |  |  |  |  |  |  |  |  |  |  |  |  |  |  |  |  |  |  | **22/27** |
| WCST - Categories Completed |  |  |  |  |  |  |  |  | +S |  |  |  |  |  |  |  |  |  |  |  | +M | +M | 3/3 |
| WCST - Perseverative Errors |  |  |  |  |  |  |  |  | -M |  |  |  |  |  |  |  |  |  |  |  | -M | -S | 3/3 |
| WCST - Perseverative Responses |  |  |  |  |  |  |  |  |  |  |  |  |  |  |  |  |  |  |  |  | -M | -S | 2/2 |
| WCST - Total No. Correct |  |  |  |  |  |  |  |  |  |  |  |  |  |  |  |  |  |  |  |  | +M | +M | 2/2 |
| WCST - Conceptual-Level Responses |  |  |  |  |  |  |  |  |  |  |  |  |  |  |  |  |  |  |  |  | -M |  | 1/1 |
| WCST - Total Errors |  |  |  |  |  |  |  |  |  |  |  |  |  |  |  |  |  |  |  |  |  | -M | 1/1 |
| WCST - Non-perseverative Errors |  |  |  |  |  |  |  |  |  |  |  |  |  |  |  |  |  |  |  |  |  | n.s. | 0/1 |
| TMT - Part B |  |  |  |  |  |  |  |  |  |  |  |  |  |  |  | -M | +M |  |  |  |  |  | 2/2 |
| Verbal Fluency (COWA / Semantic) |  |  |  |  |  |  |  |  |  |  |  |  |  |  |  | +W, n.s. | +M |  |  |  |  |  | 2/3 |
| Inhibition |  |  |  |  |  |  | -M |  |  |  |  |  |  |  |  |  |  |  |  |  |  |  | 1/1 |
| LOTCA - Thinking Operations |  |  |  |  |  |  |  |  |  |  |  | +S |  |  | +M |  |  | +M |  |  |  |  | 3/3 |
| Shipley - Abstraction |  | +M |  |  |  |  |  |  |  |  |  |  |  |  |  |  |  |  |  |  |  |  | 1/1 |
| MoCA - Abstraction |  |  |  |  |  |  |  |  |  |  |  |  |  | +W |  |  |  |  |  |  |  |  | 1/1 |
| PSI - Executive control |  |  |  |  |  |  |  |  |  |  |  |  |  | n.s. |  |  |  |  |  |  |  |  | 0/1 |
| PSI - Social inhibition |  |  |  |  |  |  |  |  |  |  |  |  |  | n.s. |  |  |  |  |  |  |  |  | 0/1 |
| PSI - Emotional control |  |  |  |  |  |  |  |  |  |  |  |  |  | n.s. |  |  |  |  |  |  |  |  | 0/1 |
| **Attention/Processing Speed/Working Memory** |  |  |  |  |  |  |  |  |  |  |  |  |  |  |  |  |  |  |  |  |  |  | **12/14** |
| SDMT |  | +S |  |  |  |  |  |  |  |  |  |  |  |  |  |  |  |  |  |  |  |  | 1/1 |
| CPT |  |  |  |  |  |  | -M |  |  |  |  |  |  |  |  |  |  |  |  |  |  |  | 1/1 |
| Digit Symbol | +S |  |  |  |  |  |  |  |  |  |  |  |  |  |  | +W |  |  |  |  |  |  | 2/2 |
| TMT - Part A |  |  |  |  |  |  |  |  |  |  |  |  |  |  |  | -W | +M |  |  |  |  |  | 2/2 |
| WAIS - Digit Span | +S |  |  |  |  |  |  |  |  |  |  |  |  |  |  |  |  |  |  |  |  |  | 1/1 |
| Digits Backward |  |  |  |  |  |  | +S |  |  |  |  |  |  |  |  |  |  |  |  |  |  |  | 1/1 |
| Digits Forward |  |  |  |  |  |  | n.s. |  |  |  |  |  |  |  |  |  |  |  |  |  |  |  | 0/1 |
| WAIS - Arithmetic | n.s. |  |  |  |  |  |  |  |  |  |  |  |  |  |  |  |  |  |  |  |  |  | 0/1 |
| Simple Reaction Time |  |  |  |  |  |  | -M |  |  |  |  |  |  |  |  |  |  |  |  |  |  |  | 1/1 |
| Choice Reaction Time |  |  |  |  |  |  | n.s. |  |  |  |  |  |  |  |  |  |  |  |  |  |  |  | 0/1 |
| PSI - Attention (Self-report) |  |  |  |  |  |  |  |  |  |  |  |  |  | -W |  |  |  |  |  |  |  |  | 1/1 |
| MoCA - Attention |  |  |  |  |  |  |  |  |  |  |  |  |  | +W |  |  |  |  |  |  |  |  | 1/1 |
| LOTCA – Execution time |  |  |  |  |  |  |  |  |  |  |  |  |  |  | -M |  |  |  |  |  |  |  | 1/1 |
| **Memory & Learning** |  |  |  |  |  |  |  |  |  |  |  |  |  |  |  |  |  |  |  |  |  |  | **5/10** |
| Verbal Learning (HVLT / RAVLT) |  |  |  |  |  |  | +S |  |  |  |  |  |  |  |  | +W, +W, +W |  |  |  |  |  |  | 4/4 |
| Logical Memory |  |  |  |  |  |  |  |  |  |  |  |  |  |  |  | +M |  |  |  |  |  |  | 1/1 |
| PMT - Sequencing factor |  |  | n.s. |  |  |  |  |  |  |  |  |  |  |  |  |  |  |  |  |  |  |  | 0/1 |
| PMT - Auditory factor |  |  | n.s. |  |  |  |  |  |  |  |  |  |  |  |  |  |  |  |  |  |  |  | 0/1 |
| PMT - Recognition factor |  |  | n.s. |  |  |  |  |  |  |  |  |  |  |  |  |  |  |  |  |  |  |  | 0/1 |
| PMT - Visual factor |  |  | n.s. |  |  |  |  |  |  |  |  |  |  |  |  |  |  |  |  |  |  |  | 0/1 |
| PMT - Constructional factor |  |  | n.s. |  |  |  |  |  |  |  |  |  |  |  |  |  |  |  |  |  |  |  | 0/1 |
| **Verbal & Language** |  |  |  |  |  |  |  |  |  |  |  |  |  |  |  |  |  |  |  |  |  |  | **3/5** |
| Verbal IQ | +M |  | n.s. |  |  |  |  |  |  |  |  |  |  |  |  |  |  |  |  |  |  |  | 1/2 |
| Vocabulary (WAIS) | n.s. |  |  |  |  |  |  |  |  |  |  |  |  |  |  |  |  |  |  |  |  |  | 0/1 |
| Vocabulary (Shipley) |  | +W |  |  |  |  |  |  |  |  |  |  |  |  |  |  |  |  |  |  |  |  | 1/1 |
| Boston Naming Test (BNT) |  |  |  |  |  |  |  |  |  |  |  |  |  |  |  | +W |  |  |  |  |  |  | 1/1 |
| **Visuospatial/Perceptual** |  |  |  |  |  |  |  |  |  |  |  |  |  |  |  |  |  |  |  |  |  |  | **4/8** |
| Picture Arrangement | +S |  |  |  |  |  |  |  |  |  |  |  |  |  |  |  |  |  |  |  |  |  | 1/1 |
| Picture Completion | n.s. |  |  |  |  |  |  |  |  |  |  |  |  |  |  |  |  |  |  |  |  |  | 0/1 |
| HVOT |  |  |  |  |  |  | +S |  |  |  |  |  |  |  |  |  |  |  |  |  |  |  | 1/1 |
| LOTCA - Visual Perception |  |  |  |  |  |  |  |  |  |  |  | n.s. |  |  | +S |  |  | n.s. |  |  |  |  | 1/3 |
| LOTCA - Spatial Perception |  |  |  |  |  |  |  |  |  |  |  | n.s. |  |  |  |  |  | n.s. |  |  |  |  | 0/2 |
| **Visual-motor Constructional/Psychomotor** |  |  |  |  |  |  |  |  |  |  |  |  |  |  |  |  |  |  |  |  |  |  | **7/11** |
| Block Design | +S |  |  |  |  |  |  |  |  |  |  |  |  |  |  | +M | n.s. |  |  |  |  |  | 2/3 |
| Object Assembly | +S |  |  |  |  |  |  |  |  |  |  |  |  |  |  |  |  |  |  |  |  |  | 1/1 |
| VMI |  |  | +M |  |  |  |  |  |  |  |  |  |  |  |  |  |  |  |  |  |  |  | 1/1 |
| LOTCA - Visuomotor Organization |  |  |  |  |  |  |  |  |  |  |  | +S |  |  |  |  |  | n.s. |  |  |  |  | 1/2 |
| LOTCA - Motor Praxis |  |  |  |  |  |  |  |  |  |  |  | n.s. |  |  |  |  |  | n.s. |  |  |  |  | 0/2 |
| Finger Tapping |  |  |  |  |  |  | +M |  |  |  |  |  |  |  |  |  |  |  |  |  |  |  | 1/1 |
| LOTCA - Psychomotor abilities |  |  |  |  |  |  |  |  |  |  |  |  |  |  | +S |  |  |  |  |  |  |  | 1/1 |
| **Social Cognition** |  |  |  |  |  |  |  |  |  |  |  |  |  |  |  |  |  |  |  |  |  |  | **6/7** |
| SIT - total |  |  |  |  | -M |  |  |  |  |  |  |  |  |  |  |  |  |  |  |  |  |  | 1/1 |
| SIT – conversational |  |  |  |  | -M |  |  |  |  |  |  |  |  |  |  |  |  |  |  |  |  |  | 1/1 |
| SIT- non-verbal |  |  |  |  | -W |  |  |  |  |  |  |  |  |  |  |  |  |  |  |  |  |  | 1/1 |
| SIT – voice quality |  |  |  |  | n.s. |  |  |  |  |  |  |  |  |  |  |  |  |  |  |  |  |  | 0/1 |
| PVRS |  |  |  |  |  |  |  | -M |  |  |  |  |  |  |  |  |  |  |  |  |  |  | 1/1 |
| CIIT |  |  |  |  |  |  |  |  |  |  |  |  |  |  |  |  |  | +S |  |  |  |  | 1/1 |
| SBST |  |  |  |  |  |  |  |  |  |  |  |  |  |  |  |  |  | +M |  |  |  |  | 1/1 |
| **Functional Cognition** |  |  |  |  |  |  |  |  |  |  |  |  |  |  |  |  |  |  |  |  |  |  | **9/12** |
| ADM |  |  |  |  |  | +S |  |  |  |  |  |  |  |  |  |  |  |  |  |  |  |  | 1/1 |
| AMPS Process Score |  |  |  |  |  |  |  |  |  | +S |  |  |  |  |  | +S |  |  |  | +S |  |  | 3/3 |
| AMPS Motor Score |  |  |  |  |  |  |  |  |  | +S |  |  |  |  |  | +W |  |  |  | +S |  |  | 3/3 |
| EFPT - Sequencing |  |  |  |  |  |  |  |  |  |  |  |  |  |  |  |  |  |  | -M |  |  |  | 1/1 |
| EFPT - Judgment & Safety |  |  |  |  |  |  |  |  |  |  |  |  |  |  |  |  |  |  | -M |  |  |  | 1/1 |
| EFPT - Completion |  |  |  |  |  |  |  |  |  |  |  |  |  |  |  |  |  |  | n.s. |  |  |  | 0/1 |
| EFPT - Organization |  |  |  |  |  |  |  |  |  |  |  |  |  |  |  |  |  |  | n.s. |  |  |  | 0/1 |
| EFPT - Initiation |  |  |  |  |  |  |  |  |  |  |  |  |  |  |  |  |  |  | n.s. |  |  |  | 0/1 |
| **Orientation** |  |  |  |  |  |  |  |  |  |  |  |  |  |  |  |  |  |  |  |  |  |  | **1/3** |
| LOTCA - Orientation |  |  |  |  |  |  |  |  |  |  |  | n.s. |  |  | n.s. |  |  | +M |  |  |  |  | 1/3 |

**Note.** This table summarizes the correlations between ACLS scores and various cognitive measures across all reviewed studies. The "Significant/Total" column indicates the number of studies reporting statistically significant correlations (*p* < .05) out of the total number of studies examining each measure. Positive correlations indicate that higher ACLS scores are associated with better performance on the cognitive measure, while negative correlations indicate that higher ACLS scores are associated with fewer errors or faster completion times.

**Abbreviation**: ADM = Allen Diagnostic Module; AMPS = Assessment of Motor and Process Skills; BNT = Boston Naming Test; CGI-S = Clinical Global Impressions-Severity Scale; CIIT = Cartoon Intention Inference Test; COWA = Controlled Oral Word Association Test; CPT = Continuous Performance Test; DSM = Diagnostic and Statistical Manual of Mental Disorders; EFPT = Executive Function Performance Test; EPPI = Eastern Pennsylvania Psychiatric Institute; HVLT = Hopkins Verbal Learning Test; HVOT = Hooper Visual Organization Test; ICD = International Classification of Diseases; IQ = Intelligence Quotient; L/ACLS = Large Allen Cognitive Level Screen; LOTCA = Loewenstein Occupational Therapy Cognitive Assessment; LOTCA-II = Loewenstein Occupational Therapy Cognitive Assessment, Second Edition; M = mean; MMSE = Mini-Mental State Examination; MoCA = Montreal Cognitive Assessment; NYU = New York University; PMT = Perceptual Memory Task; PSI = Prefrontal Symptom Inventory; PVRS = Problem Solving Verbal Reaction to everyday problematic situations; RAVLT = Rey Auditory Verbal Learning Test; SBST = Social Behavior Sequencing Task; SD = standard deviation; SDMT = Symbol Digit Modalities Test; SIT = Social Interaction Test; TMT = Trail Making Test; VMI = Test of Visual-Motor Integration; WAIS-IV = Wechsler Adult Intelligence Scale–Fourth Edition; WAIS-R = Wechsler Adult Intelligence Scale–Revised; WCST = Wisconsin Card Sorting Test; WMS = Wechsler Memory Scale.
